# Supplementary material
Source: PubMed Central journal article supplement (PMC5881939)
Supplement: NIHMS919871-supplement-1.pdf [file NIHMS919871-supplement-1.pdf]

**Supplementary Table 1: MassARRAY primer sequences**

| Name      | Sequence (5'-3')                |
|-----------|---------------------------------|
| FCCG3A-1F | GGATATGTAATTTATAGGAGTTATTG      |
| FCCG3A-1R | TTCTAATAAAAAACCCTAAAACCCC       |
| FCCG3B-1F | GGATATGTAATTTATAGGAGTTGAT       |
| FCCG3B-1R | CCCTAAAACCCTAAAACCCTAAA         |
| FCGR3A-3F | AGTTTTATTTTGGTTTGTTTTAGGAG      |
| FCGR3A-3R | CCAAACTCTTTCCTTCCTAATC          |
| FCGR3B-3F | TTTAGTTTTATTTTGGTTTGTTTTGGT     |
| FCGR3B-3R | CTCCAAACTCTTTCCTTCCTAT          |
| FCGR3A-4F | GGGGTTTTAGGGTTTTTTATTAG         |
| FCGR3A-4R | TAAAATAACTACCTAAATTCATTTCC      |
| FCGR3B-4F | TAGGGTTTTAGGGTTTTTTATTAGAA      |
| FCGR3B-4R | ACCTAAATTCATTTCTATTATCCAATC     |
| FCGR3A-5F | TATATTA AAAAGTTAGTAGTTTTTGTTGG  |
| FCGR3A-5R | TACCAAAATATACCCTCAACCA          |
| FCGR3B-5F | TATATTA AAAAGTTAGTTTTTGTTGGATTA |
| FCGR3B-5R | CTACCAAAATATACCCTCAACTT         |
| FCGR3A-6F | TGGGGTAAGTATTTTGGGATG           |
| FCGR3A-6R | CTTCTCCCTCAACCAAAAAAAC          |
| FCGR3B-6F | TGGGGGTAAGTATTTTGGGAAA          |
| FCGR3B-6R | ACTTCTCCCTCAACCAAAAAAAT         |

# Supplementary Figure 1

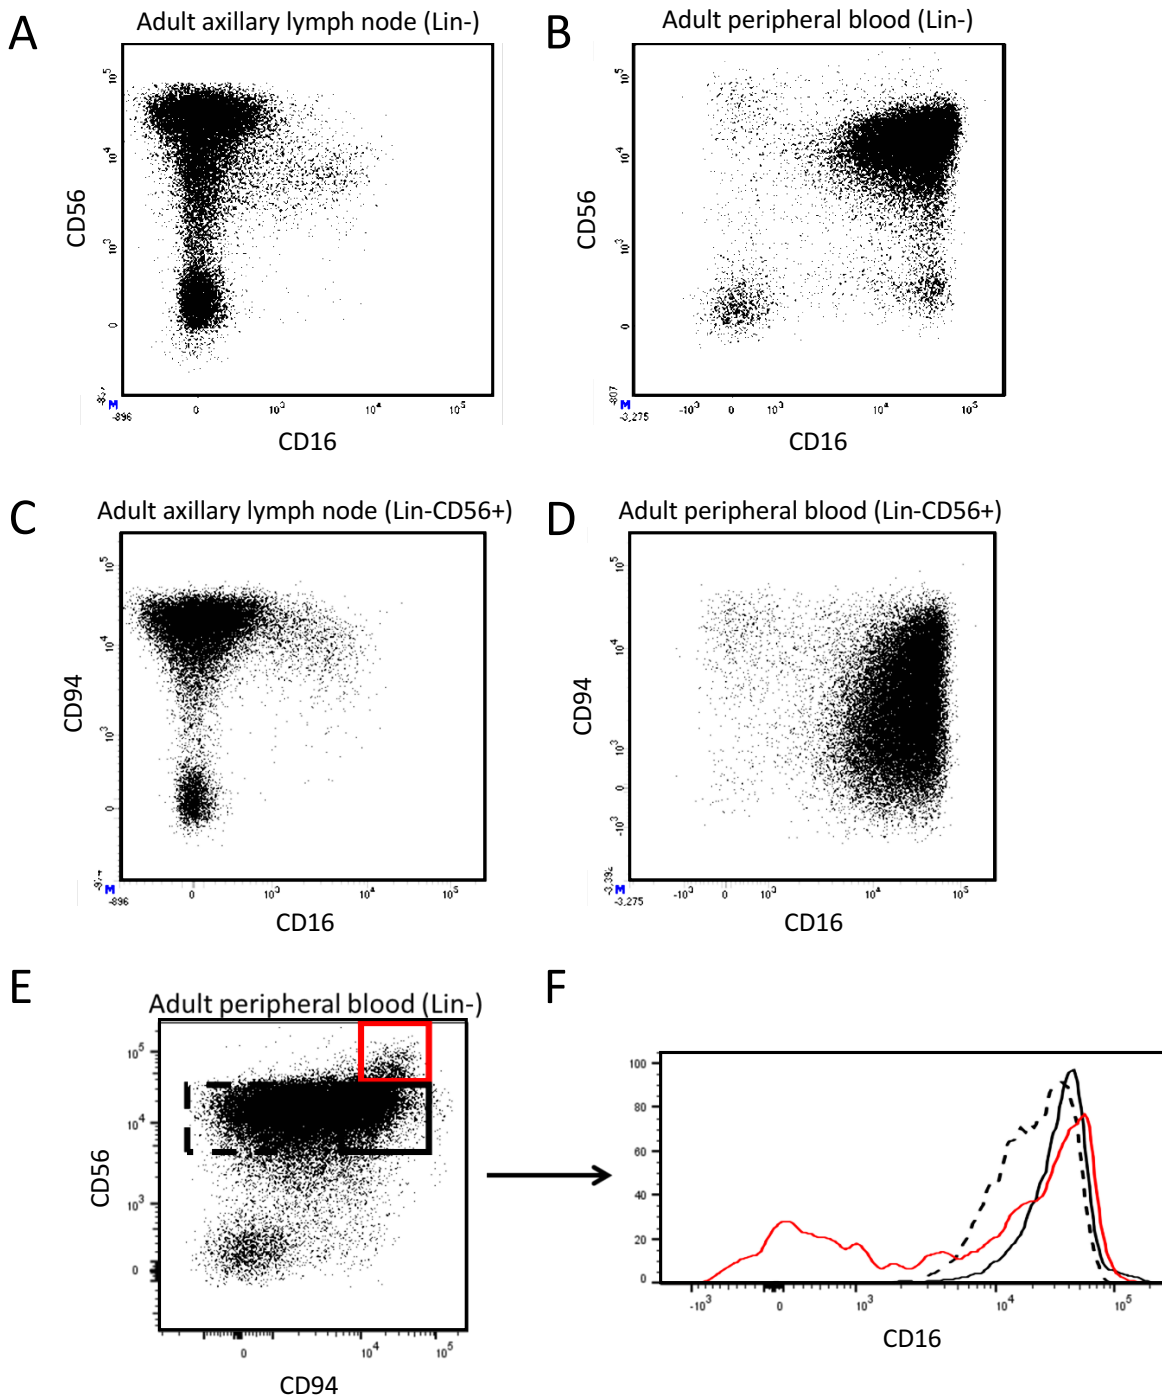

**Supplementary Figure 1: The CD94<sup>high</sup>/CD56<sup>bright</sup> NK population corresponds to a CD16<sup>low</sup> NK population.** Mononuclear cells (MNCs) from adult axillary lymph node (A and C) and adult peripheral blood (B, D, E, and F) from representative donors were analyzed by flow cytometry by gating on Lin<sup>-</sup> cells and then NK cell markers. Both axillary and peripheral blood NK cell CD16 expression was described in the context of NK markers CD56 (A and B) and CD94 (C and D). CD16 expression was also described in populations using both CD56 and CD94 (E and F).

## Supplementary Figure 2

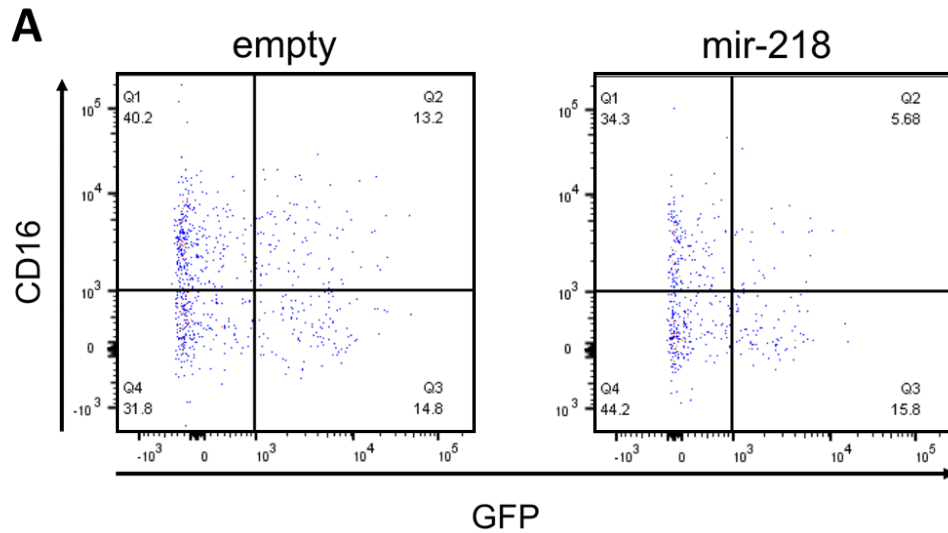

**B**

|             |        | empty     | mir-218  |
|-------------|--------|-----------|----------|
| Total cells | %GFP+  | 58.0±23.9 | 13.8±9.2 |
| GFP+ cells  | %CD16+ | 35.2±19.8 | 16.1±9.4 |
|             | %CD16- | 64.8±19.8 | 83.9±9.4 |
| CD16- cells | %GFP+  | 63.9±24.8 | 16.5±8.5 |

**Supplementary Figure 2: Transduction of primary NK cells.** Primary human NK cells were enriched from peripheral blood by negative selection. NK cells were transduced with lentivirus for either mir-218 or empty vector. (A) Cells were analyzed 2 days after infection by flow cytometry. Live cells were gated, followed by doublet discrimination and a lymphocyte gate. The population was further gated on CD3-CD56+ cells. The cut off for the GFP gate was determined by mock infection. One of six donors is shown. (B) Summary of data from six donors shown as average ± standard deviation.
